# Supplementary material for: Global hotspots of bushmeat hunting risk for mammals
Source: Research Square preprint supplement (doi:10.21203/rs.3.rs-6278255/v1), 2025-04-21
Supplement: Supplementary file 1 [file 56e102d2821888cc94793d0a.docx]

**Supplementary Information**

| **Order** | **Species** | **IUCN Red List status** | **Continent** |
| --- | --- | --- | --- |
| *Carnivora* | *Bdeogale omnivora* | VU | Africa |
| *Melogale orientalis* | LC | Asia |
| *Vulpes pallida* | LC | Africa |
| *Cetartiodactyla* | *Cephalophus natalensis* | LC | Africa |
| *Dorcatragus megalotis* | VU | Africa |
| *Eudorcas albonotata* | LC | Africa |
| *Eudorcas rufifrons* | VU | Africa |
| *Gazella spekei* | EN | Africa |
| *Madoqua piacentinii* | DD | Africa |
| *Madoqua saltiana* | LC | Africa |
| *Ourebia ourebi* | LC | Africa |
| *Tragelaphus scriptus* | LC | Africa |
| *Phacochoerus aethiopicus* | LC | Africa |
| *Tragelaphus scriptus* | LC | Africa |
| *Tragulus javanicus* | DD | Asia |
| *Tragulus nigricans* | EN | Asia |
| *Chiroptera* | *Dobsonia exoleta* | LC | Asia |
| *Dobsonia praedatrix* | LC | Oceania |
| *Mirimiri acrodonta* | CR | Oceania |
| *Nyctimene malaitensis* | LC | Oceania |
| *Pteropus aruensis* | CR | Oceania, Asia |
| *Pteropus cognatus* | VU | Oceania |
| *Pteropus gilliardorum* | VU | Oceania, Asia |
| *Pteropus griseus* | VU | Asia |
| *Pteropus keyensis* | DD | Asia |
| *Pteropus livingstonii* | CR | Africa |
| *Pteropus personatus* | LC | Asia |
| *Pteropus rayneri* | NT | Oceania |
| *Pteropus seychellensis* | LC | Africa |
| *Dermoptera* | *Cynocephalus volans* | LC | Asia |
| *Diprotodontia* | *Ailurops ursinus* | VU | Asia |
| *Dorcopsis hageni* | LC | Oceania, Asia |
| *Dorcopsis muelleri* | LC | Oceania, Asia |
| *Dorcopsulus macleayi* | LC | Oceania, Asia |
| *Spilocuscus rufoniger* | CR | Oceania, Asia |
| *Perissodactyla* | *Equus africanus* | CR | Africa |
| *Pilosa* | *Bradypus pygmaeus* | CR | North America |
| *Bradypus tridactylus* | LC | South America |
| *Choloepus didactylus* | LC | South America |
| *Primates* | *Arctocebus aureus* | LC | Africa |
| *Ateles belzebuth* | EN | South America |
| *Avahi ramanantsoavanai* | VU | Africa |
| *Brachyteles arachnoides* | CR | South America |
| *Cebus albifrons* | LC | South America |
| *Cebus brunneus* | EN | South America |
| *Cebus cesarae* | EN | South America |
| *Cebus malitiosus* | EN | South America |
| *Cercocebus galeritus* | CR | Africa |
| *Cheirogaleus lavasoensis* | EN | Africa |
| *Chlorocebus cynosuros* | LC | Africa |
| *Daubentonia madagascariensis* | EN | Africa |
| *Prolemur simus* | CR | Africa |
| *Hylobates klossii* | EN | Asia |
| *Hylobates moloch* | EN | Asia |
| *Lepilemur aeeclis* | EN | Africa |
| *Lepilemur ankaranensis* | EN | Africa |
| *Lepilemur grewcockorum* | CR | Africa |
| *Lepilemur randrianasoloi* | EN | Africa |
| *Lepilemur tymerlachsoni* | CR | Africa |
| *Lepilemur wrightae* | EN | Africa |
| *Macaca maura* | EN | Asia |
| *Nomascus concolor* | EN | Asia |
| *Nomascus gabriellae* | EN | Asia |
| *Nycticebus javanicus* | CR | Asia |
| *Perodicticus ibeanus* | LC | Africa |
| *Piliocolobus foai* | EN | Africa |
| *Piliocolobus oustaleti* | VU | Africa |
| *Piliocolobus rufomitratus* | CR | Africa |
| *Piliocolobus semlikiensis* | VU | Africa |
| *Pithecia mittermeieri* | VU | South America |
| *Plecturocebus moloch* | LC | South America |
| *Plecturocebus vieirai* | CR | South America |
| *Presbytis comata* | VU | Asia |
| *Presbytis femoralis* | CR | Asia |
| *Presbytis natunae* | VU | Asia |
| *Presbytis siberu* | EN | Asia |
| *Prolemur simus* | CR | Africa |
| *Propithecus diadema* | CR | Africa |
| *Sciurocheirus gabonensis* | LC | Africa |
| *Simias concolor* | CR | Asia |
| *Trachypithecus auratus* | VU | Asia |
| *Trachypithecus germaini* | EN | Asia |
| *Trachypithecus phayrei* | EN | Asia |
| *Rodentia* | *Coendou baturitensis* | DD | South America |
| *Hystrix pumila* | VU | Asia |
| *Solomys salamonis* | DD | Oceania |

**Table S1.** List of species that are not currently at risk of bushmeat hunting but are predicted to be at risk by 2050 under the SSP4 scenario, according to our model.
